# Supplementary material for: Moving towards universal health coverage for mental disorders in Ethiopia
Source: Int J Ment Health Syst. 2019 Feb 25;13:11. doi: 10.1186/s13033-019-0268-9 (PMC6388484; doi:10.1186/s13033-019-0268-9)
Supplement: Supplementary file 1 — Additional file 1. Situation analysis template. [file 13033_2019_268_MOESM1_ESM.xlsx]

## Sheet: Sheet1
SUSTAINABLE MENTAL HEALTH FINANCING				... = Not Available	Positive factor
				NR = Not Relevant	Negative factor
DOMAIN	SUB-DOMAIN	INDICATOR	ETHIOPIA	SOURCE	RELEVANCE	ADDITIONAL NOTES
			African LMIC	WHO Region and World Bank income category
			Low	World Bank income category
Mental Health Burden
	Burden of disease
		Population in 2012
		Cause-specific mortality, absolute estimated deaths from mental and behavioural disorders, 2012
Most important indicators highlighted in yellow		Cause-specific mortality, per 100,000 population, 2012
		DALY, rank of major depressive disorder, 2010
		DALY, percentage change 1990-2010 (approximation from IHME infographic)
		DALY, absolute, 2012
		DALY, per 100,000 population, 2012
		YLD, rank of major depressive disorder, 2010
		YLD, absolute, 2012
		YLD, per 100,000 population, 2012
		Age-standardized suicide rates (per 100,000) female/male
		Age-standardized suicide rates (per 100,000) female/male for WHO region and WB income category
		Neuropsychiatric disorders as % of global burden of disease
		Prevalence of alcohol use disorders (%) both sexes, 2010
		Prevalence of alcohol use disorders (%) both sexes, 2010 for respective WHO region
	Economic burden
		Household OOPS
Mental Health System
	Governance
		A stand-alone law for mental health
		If no, is mental health integrated into general health or disability law
		ATLAS checklist score (0-5) for compliance of laws with international human rights instruments
		Up-to-date policies or plans
		Current status of mental health policy or plan
		ATLAS checklist score (0-5) for compliance of policies with international human rights instruments
		Number of functional mental health prevention and promotion programmes
		National suicide prevention strategy
	Financing (total government annual spending)
		Total mental health expenditure (US$ per capita, 2013)
		Inpatient expenditure for mental health (US$ per capita, 2013)
		Outpatient expenditure for mental health (US$ per capita, 2013)
		Mental hospital expenditure (US$ per capita, 2013)
		Mental health expenditure as % GDP
		Mental health expenditure as % THE
		Mental hospitals as % mental health expenditure
		Main source of funding for care of severe mental health disorders, according to questionnaire
	Human resources
		Psychiatrists working in mental health sector (per 100,000, 2014)
		Nurses working in mental health sector (per 100,000, 2014)
		Primary care nurses and midwives trained in mental health at least two days in the last two years (% trained, 2014)
		Psychologists working in mental health sector (per 100,000, 2014)
		Social workers working in mental health sector (per 100,000, 2014)
		Total workforce in mental health sector (per 100,000, 2014)
		Median total workforce (per 100,000, 2014) for respective income category
		Total outpatient staff as % of total workforce in mental health sector
	Availability of services
		Total inpatient beds (per 100,000) in 2014
		Mental health community residential facilities (per 100,000, 2014) (inpatient)
		Mental health day treatment facilities (per 100,000, 2014) (inpatient)
		Mental hospitals (per 100,000, 2014) (inpatient)
		Mental hospital beds (per 100,000, 2014)
		Mental hospital beds (per 100,000) in 2011
		Mental health outpatient facilities (per 100,000, 2014)
	Access to care for persons with mental disorders
		Number who received inpatient and day careservices in the last year
		Number who received mental hospital carein the last year
		Number who received outpatient and primary health careservices in the last year
		Number who received outpatient facility servicesin the last year
		% of inpatients in mental hospitals on Dec 31st staying < 1 year
		% of inpatients in mental hospitals on Dec 31st staying 1-5 years
		% of inpatients in mental hospitals on Dec 31st staying > 5 years
		Total admissions to inpatient facilities
		Involuntary admissionsto inpatient facilities as % of total admissions
		Total number of persons discharged from mental hospitals in the last year
		One month follow-up as % of all discharged from mental hospitals in the last year
		% follow-up from mental hospital discharge for the respective WHO region
Overall Health System
	Health status
		Maternal mortality ratio (modelled estimate, per 100,000 live births, 2013)
		Maternal mortality growth (1990-2013)
		Life expectancy at birth, total years, 2013
		Survival to age 65, female (% of cohort, 2013)
		Survival to age 65, male (% of cohort, 2013)
		NCDs as % total deaths, 2012
		NCDs as % DALYs, 2010
		Distribution of YLL by NCD, 2012
		Probability of dying aged 30-70 years from the 4 main NCDs
	Financing, total (THE = total health expenditure)
		THE per capita at exchange rate (US$, 2013)
		THE per capita x-rate (US$, 2013) for respective WHO region
		THE per capita at PPP (NCU per US$)
		THE as % GDP, 2013
		THE as % GDP, 2013 for respective WHO region
		External resources on health as % THE, 2013
		ExtHE as % of THE, 2013 for respective WHO region
		Domestic funding for health as % THE
		Private spending (PvtHE) as % THE, 2013
		PvtHE as % THE, 2013 for respective WHO region
		Spending by households (OOPS) as % THE
		Expenditure by government (GGHE) as % THE
		GGHE as % THE, 2013 for respective WHO region
		Prevention and public health services as % THE
	Financing, public (GGHE = general government expenditure on health)
		GGHE / cap x-rate
		GGHE / cap x-rate, for respective WHO region
		GGHE / cap PPP (NCU per $US)
		GGHE as % GDP, 2013
		How [GGHE as % GDP] compares to respective WHO regions
		GGHE as % GGE, 2013
		GGHE as % GGE, 2013 for respective WHO region
		GGHE as % GGE in excess of Abuja Declaration of 15%
		Government expenditure on inpatient care as % GGHE
		Social security funds as % GGHE (2013)
		SSHE as % GGHE, 2013 for respective WHO region
	Financing, private (PvtHE = private expenditure on health; OOPS = out-of-pocket expenditure)
		OOPS / cap x-rate, 2013
		OOPS as % PvtHE, 2013
		OOPS as % PvtHE, 2013 for respective WHO region
		OOPS (2013) as % GNI per capita (2014)
		Private insurance as % PvtHE, 2013
		Prepds as % PvtHE, 2013 for respective WHO region
	Delivery and access
		Estimate of health coverage as % of total population, 2010
		Community health workers (per 1000 people)
		Nurses and midwives (per 1000 people)
		Physicians (per 1000 people)
		Hospital beds (per 1000 people)
	Service coverage
		Difference in RMNCH coverage (%) between poorest and highest quintile, 2011
		Difference in RMNCH coverage (%) between rural and urban, 2011
		Immunization coverage among 1 year olds (%) (average coverage across BCG, DTP3, HepB3, Hib3, MCV)
		Antenatal care coverage, at least one visit (%) (2011)
		Antenatal care coverage, at least four visits (%) (2011)
		Births attended by skilled health staff (% of total, 2013)
		NCD coverage ….
Macroeconomic Situation
	Size of the economy
		GNI per capita (current US$, 2014)
		GDP per capita (current US$, 2014)
		GDP per capita (current US$, 2013) for respective WHO region
	Economic growth
		Real GDP growth (annual %, 2014)
		Real GDP growth (annual %, 2014) for the WB region
		Inflation, GDP deflator (annual %, 2014)
		Inflation, consumer prices (annual %, 2014)
	Government finances
		General government expenditure (GGE) in national currency billions
		General government final consumption expenditure as % GDP, 2014
		GGE as % of GDP compared to countries of the same income level in the region
		General government total expenditure as % of GDP
		Current account balance (US$ billions, 2015)
		Current account balance as % of GDP, 2015
		General government structure balance (% of GDP, 2015)
		Cash surplus/deficit (% of GDP, 2012)
		General government revenue (% of GDP, 2015)
		Tax revenue (% of GDP, 2012)
	Debt/borrowing
		General government gross debt (% of GDP, 2015)
		General government net debt (% of GDP, 2015)
		General government net lending/borrowing (% of GDP, 2015)
		General government primary net lending/borrowing (% of GDP, 2015)
		Total debt service (% of exports of goods, services and primary income, 2013)
		External debt stocks, total (DOD, current US$ in billions, 2013)
		WB IDA/IBRD, dispursed amount (current US$ in billions, 2015)
		WB IDA/IBRD, undispursed amount (current US$ in billions, 2015)
		WB IDA/IBRD, borrower's obligation (current US$ in billions, 2015)
Level of Development (risk factors for health)
	Poverty and inequality
		Poverty gap at $1.25 a day (PPP, mean % below poverty line, 2010)
		Poverty headcount ratio at $1.25 a day (PPP, % of population, 2010)
		Multidimensional poverty headcount, 2011 (% of population with a weighted deprivation score of at least 33%)
		GINI coefficient, 2011
	Development indicators
		Human development index, 0 (lowest) - 1 (highest)
		Average annual HDI growth (%) 2000-2013
		Adult literacy rate, % population aged >= 15 years, 2007-2014
		Improved sanitation facilities (% of population with access), 2012
		Improved water source (% of population with access), 2012
		Malnutrition prevalence, height for age (% of children under 5), 2006-2014
		Malnutrition prevalence, weight for age (% of children under 5), 2006-2014
	Social protection & labour
		Adequacy of social insurance programs (% of total welfare of beneficiary households), 2010
		Coverage (%) of all social assistance (2010)
		Coverage (%) of all social insurance (2010)
		Coverage (%) of all social protection and labour (2010)
		Social health protection as % of total population, 2008-2011
		Labour force participation rate (%), 2013
		Total unemployment as % of total labour force, 2013
		Long-term unemployment as % of total unemployment, 2012
		Vulnerable employment as % of total employment
		Public social protection expenditure as a % of GDP, 2010
		Public social protection expenditure of health care as % of GDP, 2010
		Share of unemployed receiving regular periodic social security unemployment benefits, 2013
Political Situation
	Polity
		Regime type
		Polity score, score from -10 (strongly autocratic) to +10 (strongly democratic)
		Regulation of executive recruitment, score 1-3 (unregulated, designational/transitional, regulated)
		Competitiveness of executive recruitment, score 1-3 (selection, dual/transitional, election)
		Openness of executive recruitment, score 1-4 (closed, designation, election, open)
		Executive constraints, score 0-7 (unlimited authority, intermediate, slight to moderate limitation, intermediate, substantial limitation, intermediate,executive subordination)
		Regulation of participation, score 1-5 (unregulated, multiple identity, sectarian, restricted, regulated)
		Competitiveness of participation, score 0-5 (not applicable, repressed, suppressed, factional, transitional, competitive)
	Stability
		Regime durability (number of years since most recent regime change), 2013
		Fragility index, ranking from 0 (no fragility) to 25 (extreme fragility)
		Political stability and absence of violence/terroism, percentile rank 0 (lowest)-100 (highest)
		Total number of displaced persons residing in the country ('000)
		Total number of displaced persons originating from the country ('000)
	Control of corruption
		Control of corruption, percentile rank among all countries 0-100
		Corruption perceptions index, rank out of 175 (2014)
Demographic Situation
	Demographic profile
		Age dependency ratio (% of working-age population, 2013)
		Age dependency ratio, old (% of working-age population, 2013)
		Population growth (annual %, 2013)
		Fertility rate, total (births per woman, 2013)
		Birth rate, crude (per 1000 people, 2013)
